# Supplementary figures and images for: The Membrane Protein Sortilin Is a Potential Biomarker and Target for Glioblastoma
Source: MDPI journal article supplement (doi:10.3390/cancers15092514), 2023-04-27

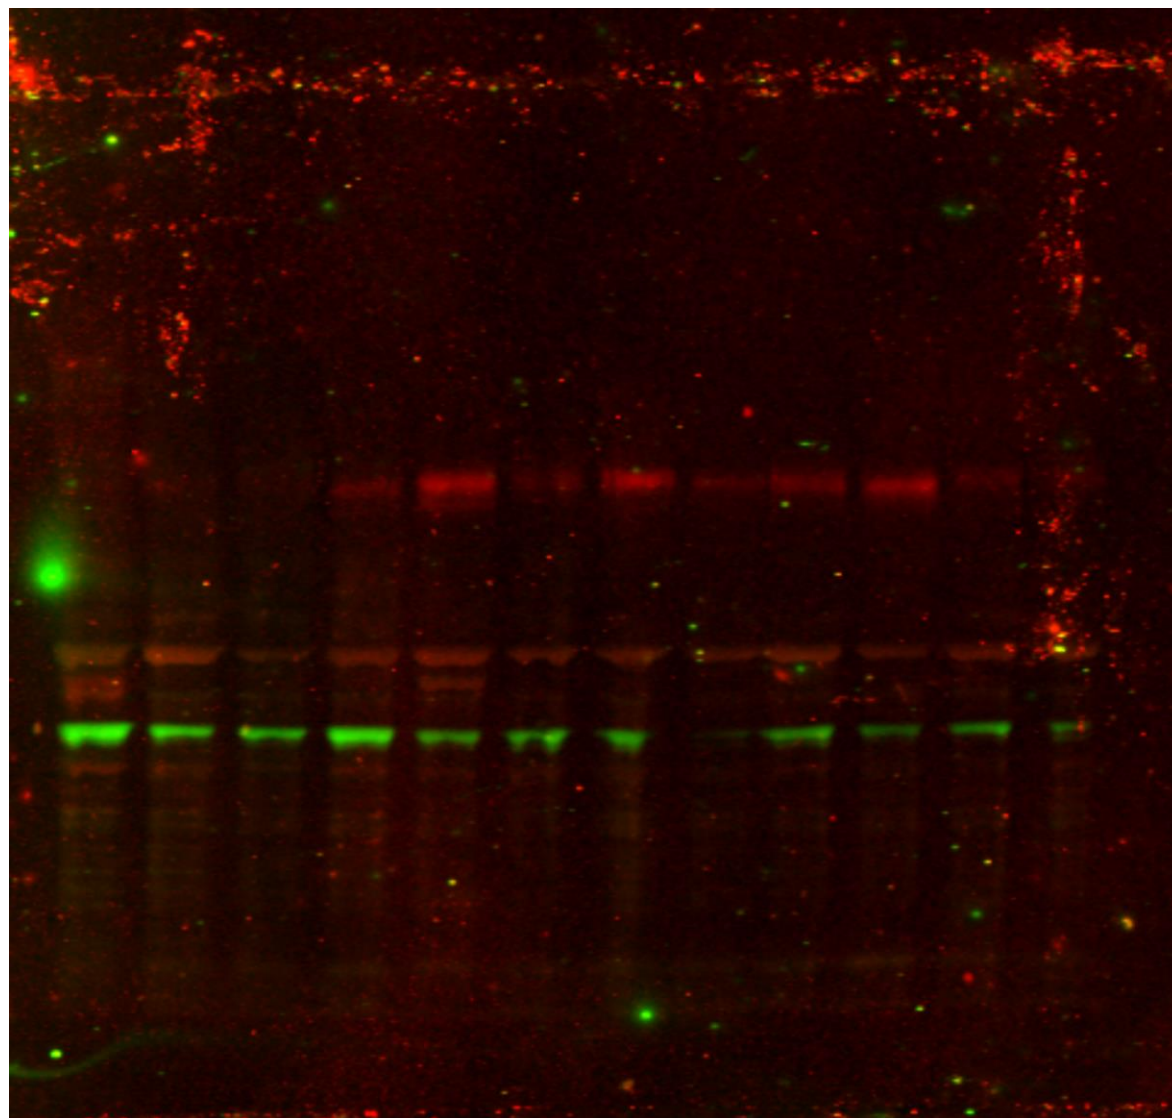

Supplement: s1 [file s1]
